# Supplementary material for: The TRAPPIII complex activates the GTPase Ypt1 (Rab1) in the secretory pathway
Source: PubMed Central journal article supplement — J Cell Biol. 2018 Jan 2;217(1):283–98. doi: 10.1083/jcb.201705214 (PMC5748984; doi:10.1083/jcb.201705214), 2018-01-02
Supplement: JCB_201705214_sm.pdf [file JCB_201705214_sm.pdf]

Thomas et al., <https://doi.org/10.1083/jcb.201705214>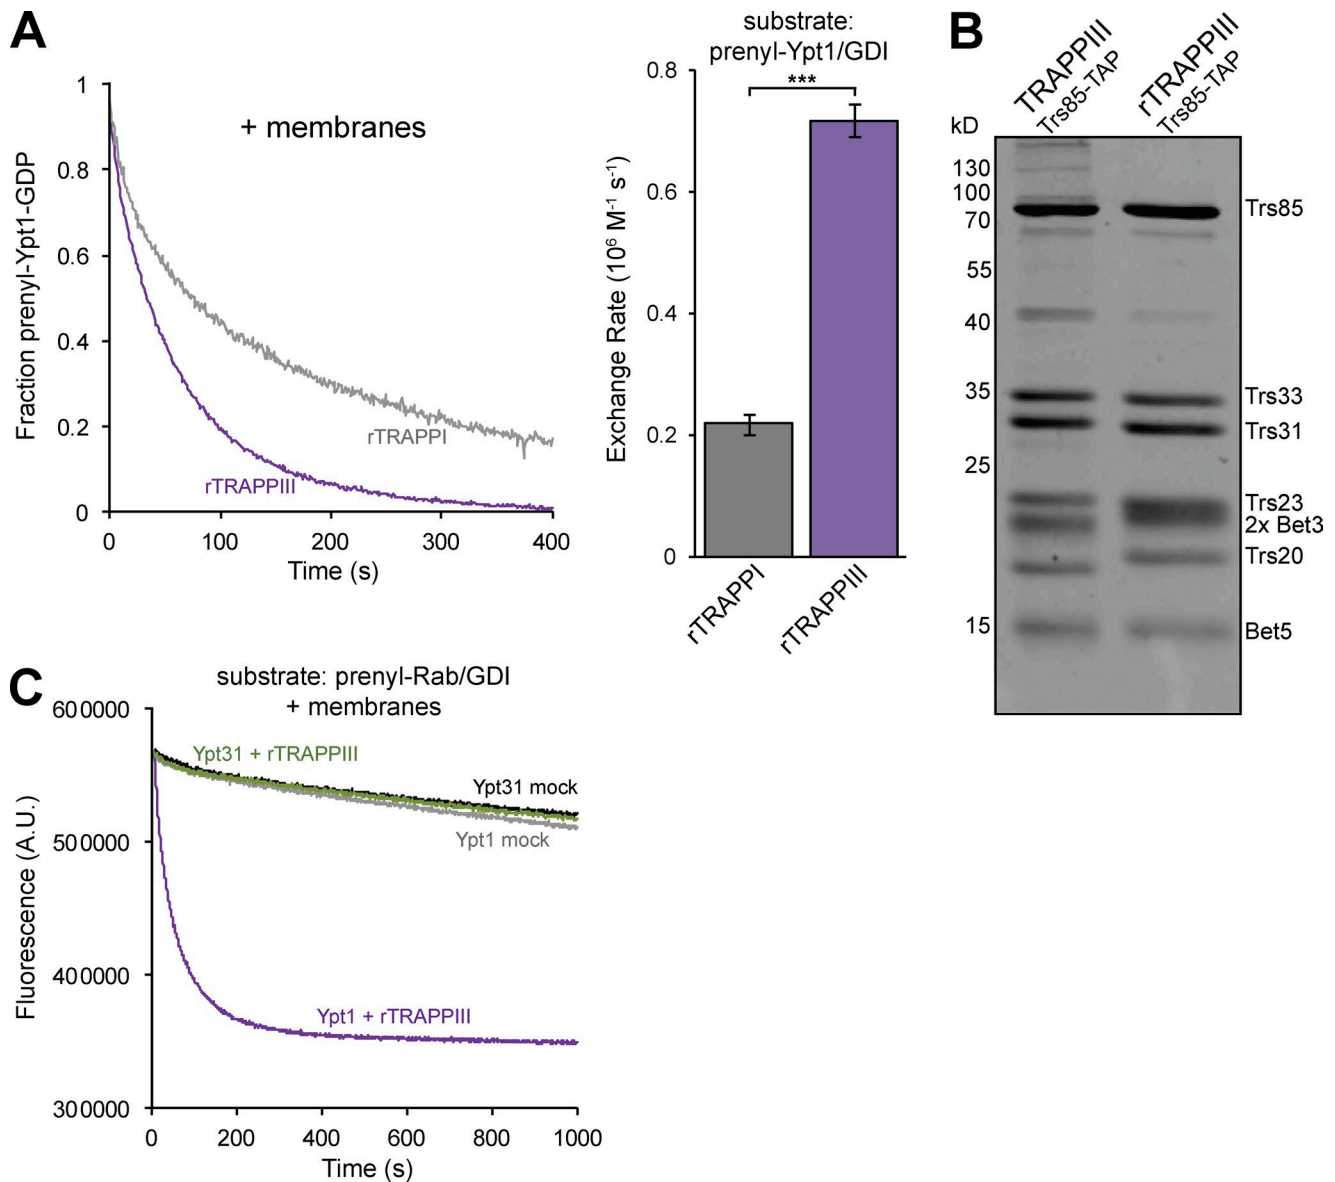

Figure S1. **TRAPPIII is a specific GEF for Ypt1.** (A, left) Normalized representative traces showing activation of prenylated Ypt1 by rTRAPPI and rTRAPPIII in the presence of phosphatidylcholine liposomes. (A, right) Rates of rTRAP-mediated Ypt1 activation quantified from the traces at left. Error bars represent 95% CIs.  $n \geq 3$  reactions. (B) Endogenous and rTRAPPIII was purified from yeast or *E. coli*, respectively, using TAP-tagged Trs85. (C) Representative raw traces showing activation of prenylated Rab substrates by rTRAPPIII in the presence of TGN liposomes. "Mock" traces are buffer-only control reactions. \*\*\*,  $P < 0.001$  for unpaired two-tailed *t* test with Welch's correction.

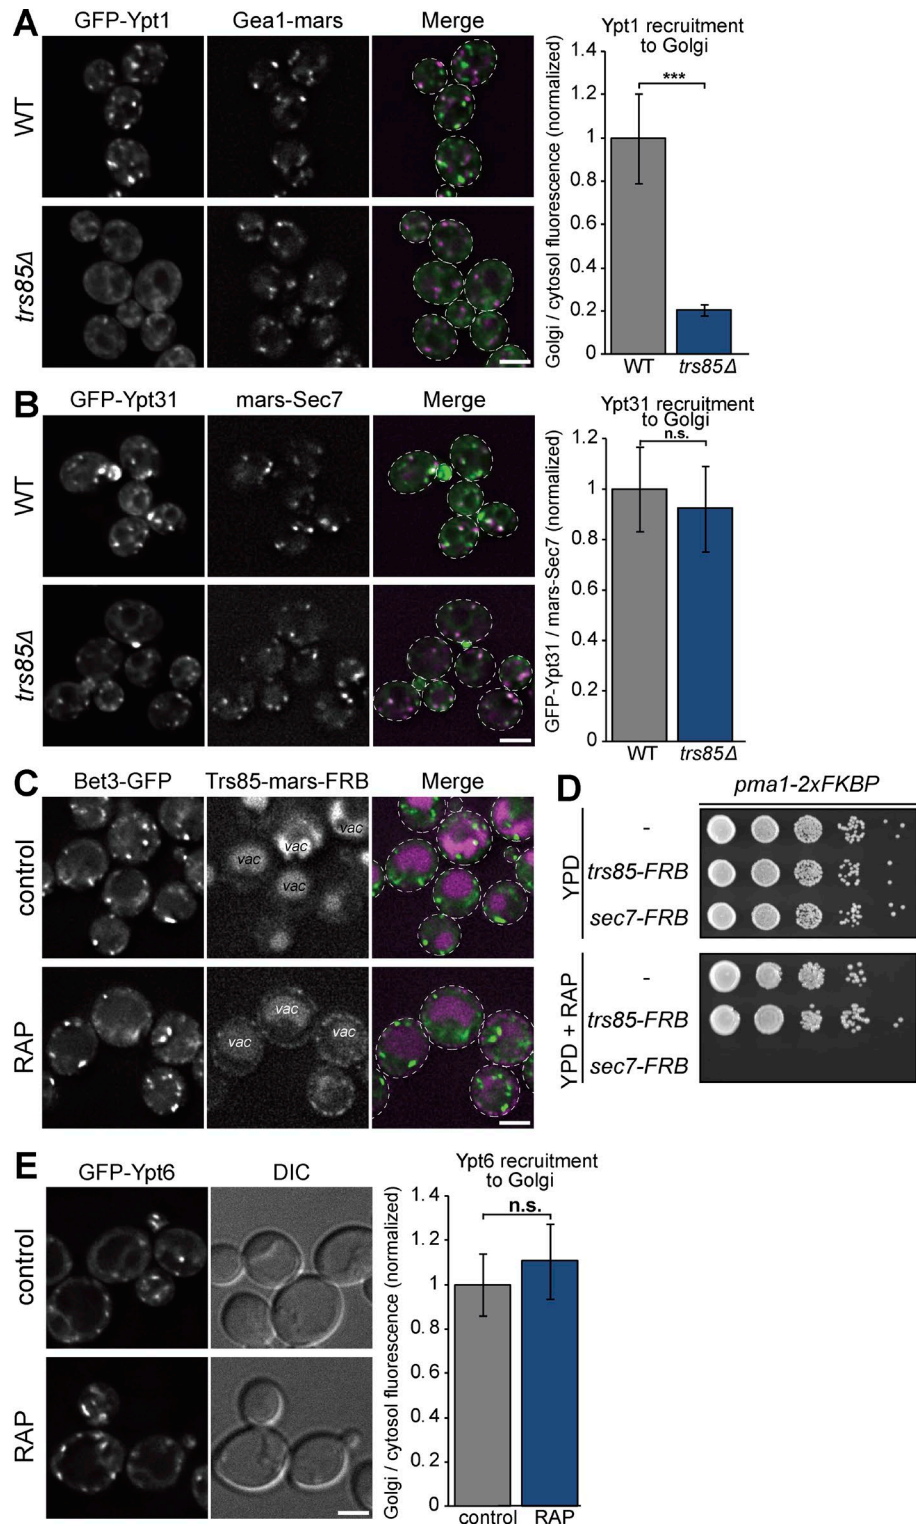

Figure S2. **Loss of TRAPP III at the Golgi specifically affects Ypt1 activation.** (A, left) Localization of plasmid-borne GFP-Ypt1 relative to the early Golgi Arf-GEF Gea1-3xmRFPmars in WT versus *trs85Δ* mutant cells grown at 30°C. (A, right) Quantification of Golgi and cytosolic Ypt1 in WT versus *trs85Δ* cells. Error bars represent 95% CIs.  $n = 16$  cells. (B, left) Localization of an extra copy of GFP-Ypt31 relative to the late Golgi/TGN marker mRFPmars-Sec7 in WT versus *trs85Δ* cells. (B, right) Recruitment of Ypt31 to Golgi compartments was measured by quantifying the ratio of GFP-Ypt31 to mRFPmars-Sec7 in mRFPmars-Sec7 puncta. Error bars represent 95% CIs.  $n \geq 60$  Golgi compartments. (C) Localization of Trs85-mRFPmars-FRB and Bet3-GFP in cells expressing the PM hook Pma1-2xFKBP treated or not treated with rapamycin (RAP). "Vac" designates the autofluorescent vacuole. (D) Growth of the Pma1-2xFKBP anchor-away strain in the presence of rapamycin indicates that anchor-away of Trs85-mRFPmars-FRB is not toxic to cells (*TRs85* is not an essential gene). Anchor-away of the essential Sec7 protein causes cell death. (E) Localization of GFP-Ypt6 in untreated cells versus cells treated with rapamycin to relocate Trs85 to the PM. (E, right) Quantification of Golgi and cytosolic Ypt6 in untreated versus rapamycin-treated cells. Error bars represent 95% CIs.  $n \geq 12$  cells. \*\*\*,  $P < 0.001$  for unpaired two-tailed  $t$  test with Welch's correction. Dashed lines represent cell boundaries. Bars, 2  $\mu\text{m}$ . DIC, differential interference contrast.

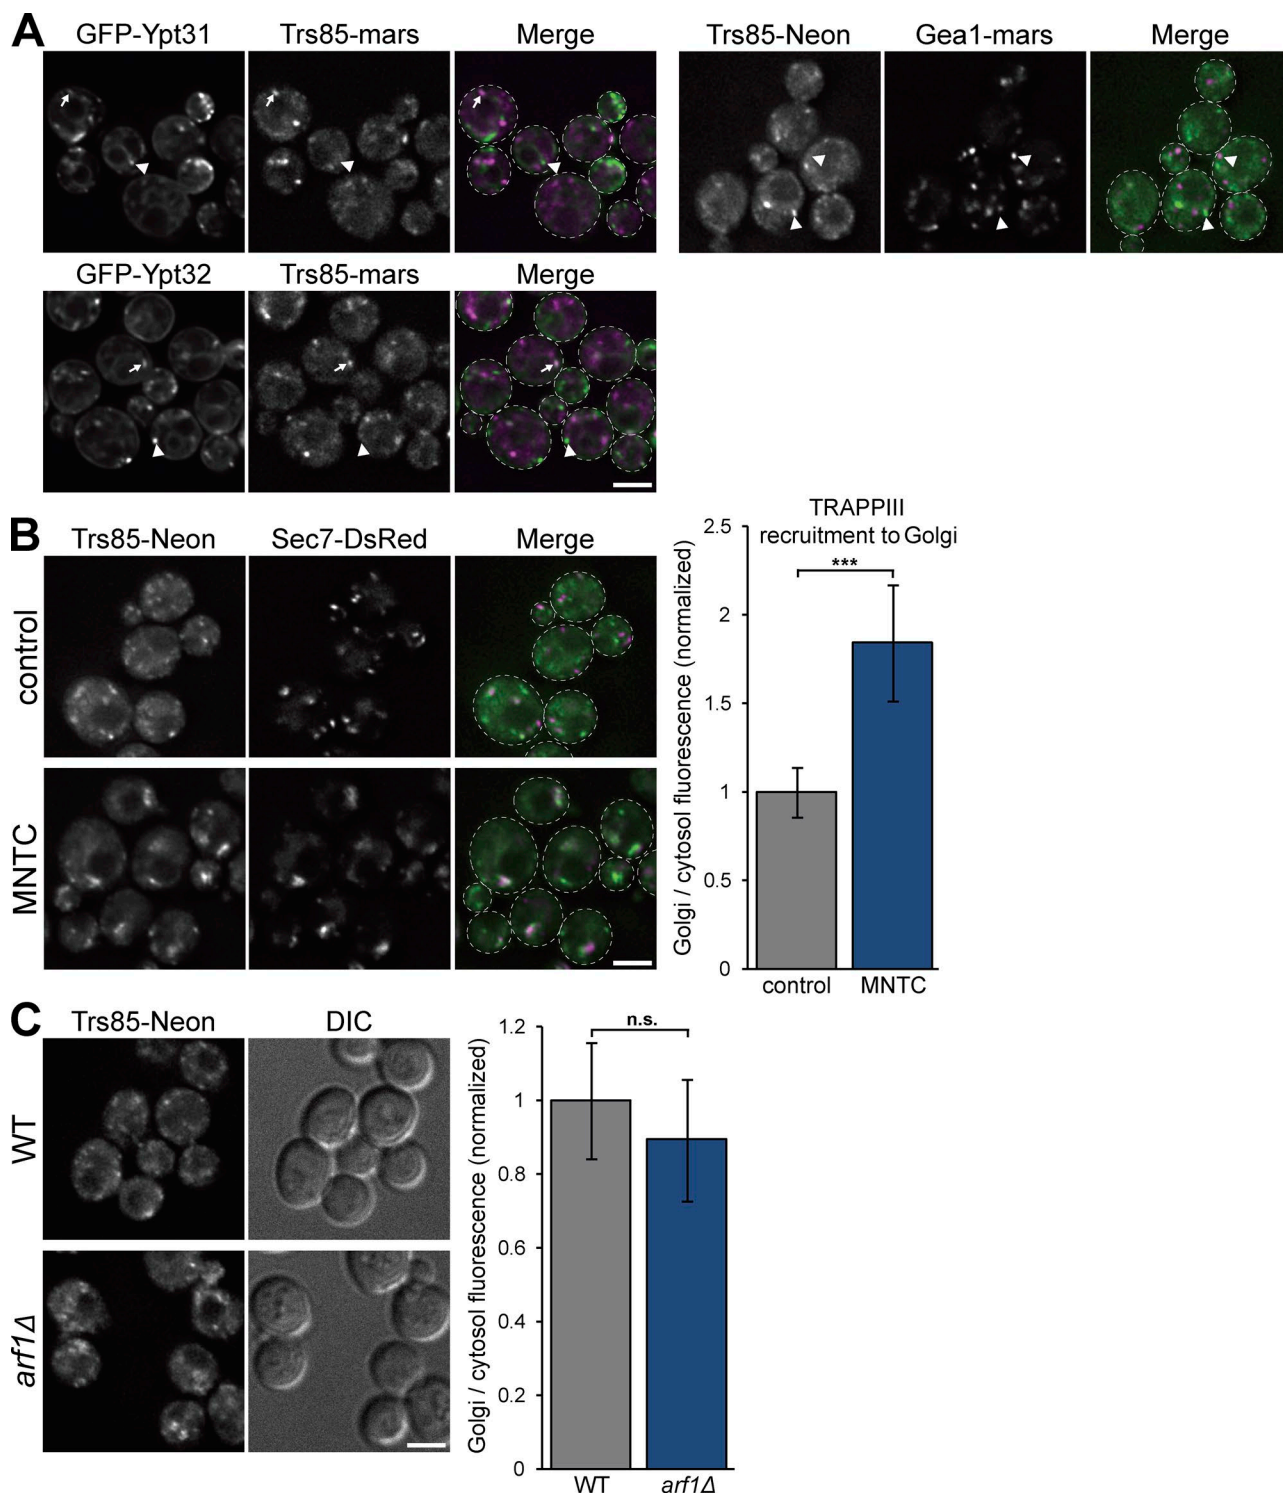

Figure S3. **TRAPPIII localizes to medial/late Golgi compartments.** (A) Localization of Trs85-3xmRFPmars or Trs85-mNeonGreen relative to Gea1-3xmRFPmars (early Golgi) or GFP-Ypt31/32 (TGN) in log-phase cells grown at 30°C. (B, left) Localization of Trs85-mNeonGreen relative to Sec7-6xDsRed in cells treated with the Sec7 inhibitor MNTC. (B, right) Line-trace quantification of Golgi and cytosolic TRAPPIII in untreated versus MNTC-treated cells. Error bars represent 95% CIs.  $n = 16$  cells. (C, left) Localization of Trs85-mNeonGreen in WT versus *arf1Δ* mutant cells grown at 30°C. (C, right) Quantification of Golgi and cytosolic TRAPPIII in WT versus *arf1Δ* cells. Error bars represent 95% CIs.  $n \geq 10$  cells. \*\*\*,  $P < 0.001$  for unpaired two-tailed  $t$  test with Welch's correction. White arrows and arrowheads denote colocalization or lack thereof, respectively. Dashed lines represent cell boundaries. Bars, 2  $\mu$ m. DIC, differential interference contrast.

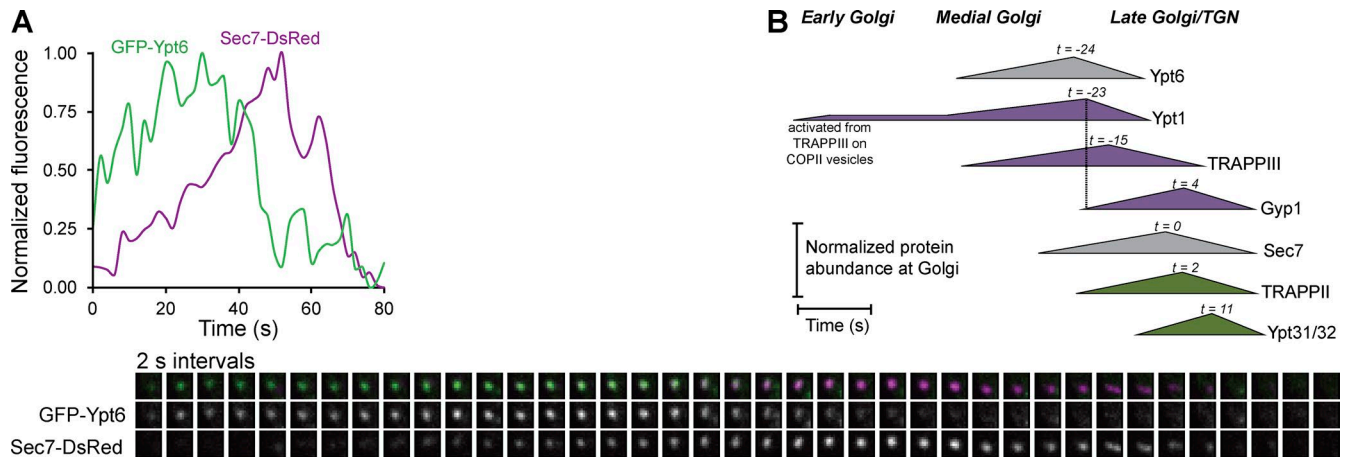

Figure S4. **The Rab GTPase Ypt6 is recruited to the Golgi directly upstream of TRAPPIII.** (A) Time-lapse imaging series (2-s intervals; bottom) and normalized quantification (top) for GFP-Ypt6 and Sec7-6xDsRed at a single Golgi compartment. (B) Summary of the timing of Rab, GEF, and GAP localization to the medial/late Golgi.  $t = 0$  is set to peak Sec7 recruitment. Regions of interest for time-lapse imaging are  $0.7 \times 0.7 \mu\text{m}$ .

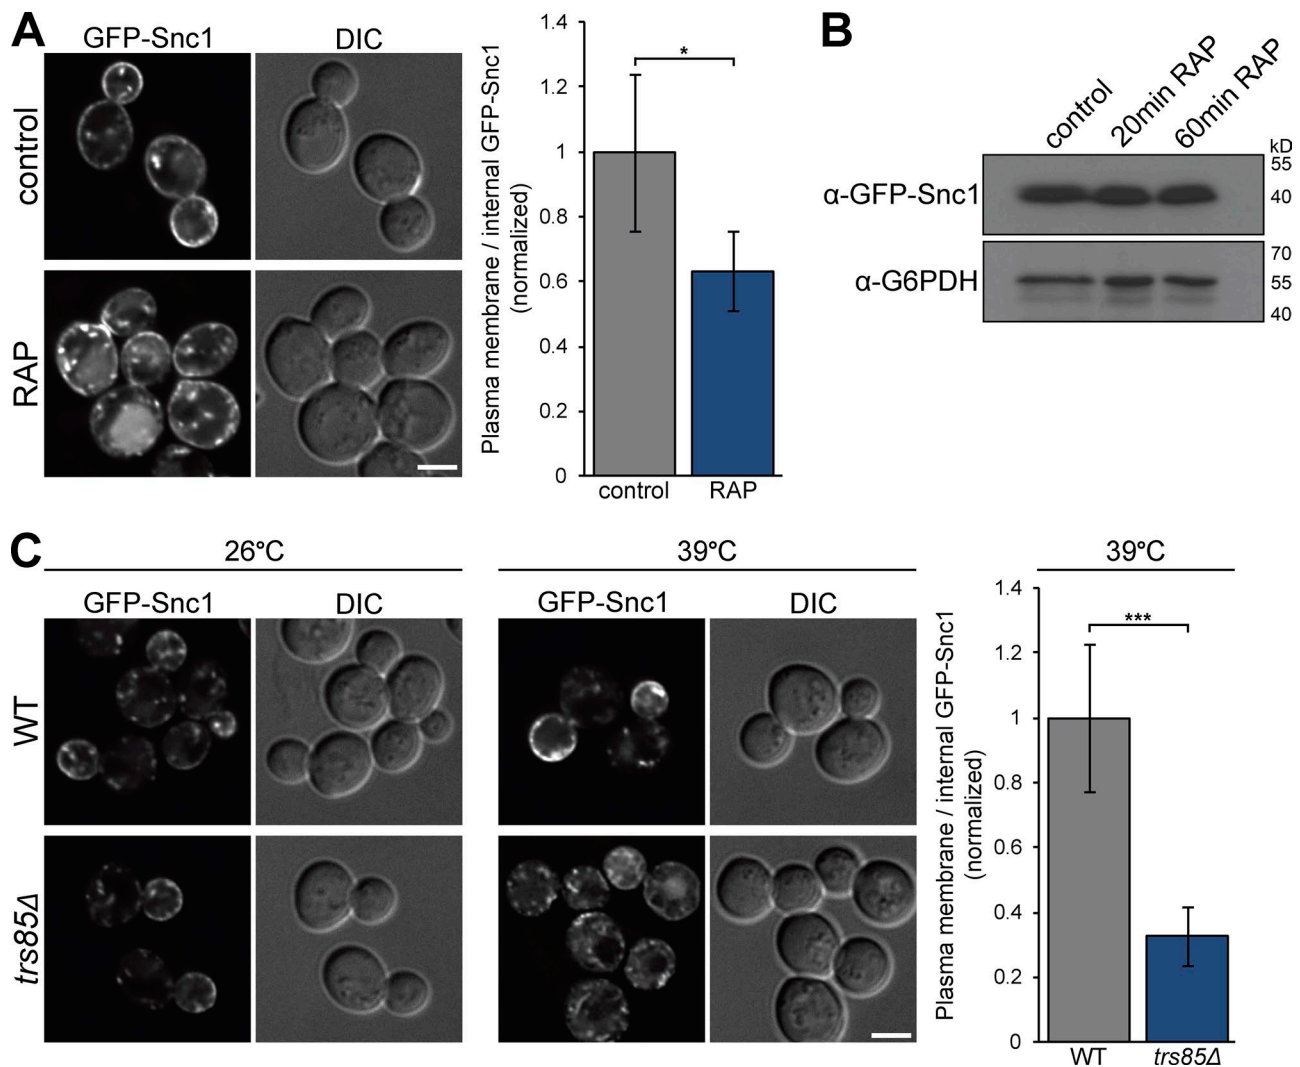

Figure S5. **Disruption of Trs85 function by anchor-away perturbs GFP-Snc1 trafficking.** (A, left) Localization of GFP-Snc1 in untreated cells versus cells treated with rapamycin (RAP) for 60 min to relocate Trs85 to the PM. (A, right) Line-trace quantification of PM-localized GFP-Snc1 in untreated versus rapamycin-treated cells. Error bars represent 95% CIs.  $n \geq 10$  cells. (B) Western blot demonstrating that the total cellular levels of GFP-Snc1 are unchanged by Trs85 anchor-away. G6PDH served as a loading control. (C, left) Localization of GFP-Snc1 in WT versus *trs85Δ* mutant cells grown at 26°C and after shifting to 39°C for 90 min. (C, right) Line-trace quantification of PM-localized GFP-Snc1 in WT versus *trs85Δ* cells. Error bars represent 95% CIs.  $n \geq 10$  cells. \*,  $P < 0.05$ ; \*\*\*,  $P < 0.001$  for unpaired two-tailed  $t$  test with Welch's correction. Bars, 2  $\mu$ m. DIC, differential interference contrast.

Table S1. **Plasmids used in this study**

| <b>Name</b>           | <b>Description</b>                                                            | <b>Backbone</b> | <b>Source</b>               |
|-----------------------|-------------------------------------------------------------------------------|-----------------|-----------------------------|
| pLT14                 | rTRAPPI with Trs33, His <sub>6</sub> (TEV)Trs31, Trs23, Bet3, Trs20, and Bet5 | pCOLA-Duet-1    | (Thomas and Fromme, 2016)   |
| pLT21                 | rTRAPPI plasmid with His <sub>6</sub> tag removed from Trs31                  | pCOLA-Duet-1    | (Thomas and Fromme, 2016)   |
| pLT92                 | Trs85 with C-terminal TAP tag                                                 | pETDuet-1       | This study                  |
| Ypt1-His <sub>7</sub> | Ypt1 with C-terminal His <sub>7</sub> tag and cleavable N-terminal GST tag    | pGEX-6P         | (McDonold and Fromme, 2014) |
| pLT50                 | Full-length Ypt1 with cleavable N-terminal GST tag                            | pGEX-6P         | (Thomas and Fromme, 2016)   |
| pLT72                 | Full-length Ypt31 with cleavable N-terminal GST tag                           | pGEX-6P         | (Thomas and Fromme, 2016)   |
| pLT40                 | Gdi1 with cleavable N-terminal GST tag                                        | pGEX-6P         | (Thomas and Fromme, 2016)   |
| pLT35                 | Mrs6 with cleavable N-terminal His <sub>6</sub> tag                           | pET28           | (Thomas and Fromme, 2016)   |
| pLT41                 | Bet2 with cleavable N-terminal His <sub>6</sub> tag and Bet4                  | pCDF-Duet-1     | (Thomas and Fromme, 2016)   |
| pRC2100               | GFP-Ypt1 in pRS415                                                            | pRS415          | (Buvelot Frei et al., 2006) |
| pRC650                | GFP-Ypt6 in pRS415                                                            | pRS415          | (Buvelot Frei et al., 2006) |
| pAS602                | HA-GFP-Sed5 in pRS315                                                         | pRS315          | (Weinberger et al., 2005)   |
| pLT45                 | mRFPmars-Sec7 in pRS415                                                       | pRS415          | (Thomas and Fromme, 2016)   |
| pRC678                | GFP-Ypt31 integration plasmid                                                 | pRS306          | (Buvelot Frei et al., 2006) |
| Sec7-6xDsRed          | Sec7-6xDsRed integration plasmid                                              | pRS406          | (Losev et al., 2006)        |
| iGFP-Vrg4             | iGFP-Vrg4 integration plasmid                                                 | Ylplac211       | B. Glick                    |
| GFP-Snc1              | GFP-Snc1 integration plasmid                                                  | pRS306          | (Lewis et al., 2000)        |

Table S2. Yeast strains used in this study

| Name            | Description                                                                                                                                 | Source                      |
|-----------------|---------------------------------------------------------------------------------------------------------------------------------------------|-----------------------------|
| SEY6210         | <i>MAT<math>\alpha</math> ura3-52 his3-<math>\Delta</math>200 leu2-3,112 lys2-801 trp1-<math>\Delta</math>901 suc2-<math>\Delta</math>9</i> | (Robinson et al., 1988)     |
| SEY6210.1       | <i>MAT<math>\alpha</math> ura3-52 his3-<math>\Delta</math>200 leu2-3,112 lys2-801 trp1-<math>\Delta</math>901 suc2-<math>\Delta</math>9</i> | (Robinson et al., 1988)     |
| BY4741 $\alpha$ | <i>MAT<math>\alpha</math> ura3-<math>\Delta</math>0 his3-<math>\Delta</math>1 leu2-<math>\Delta</math>0 met15-<math>\Delta</math>0</i>      | (Brachmann et al., 1998)    |
| CUY4655         | <i>MAT<math>\alpha</math> ura3 his3-11,15 leu2-3,112 trp1-1 can1-100 tor1-1 fpr1::NatMX<br/>Pma1-2xFKBP::TRP1</i>                           | (Auffarth et al., 2014)     |
| CFY1066         | SEY6210.1 <i>ypt1-3::KanMX</i>                                                                                                              | This study                  |
| CFY1681         | SEY6210.1 <i>Sec7-6xDsRed</i>                                                                                                               | (McDonald and Fromme, 2014) |
| CFY1784         | SEY6210 <i>GFP-Ypt31::URA3</i>                                                                                                              | (McDonald and Fromme, 2014) |
| CFY1854         | CUY4655 <i>Sec7-FRB::KanMX</i>                                                                                                              | This study                  |
| CFY1905         | BY4741 $\alpha$ <i>Bet3-TAP::HIS3</i>                                                                                                       | Open Biosystems             |
| CFY1903         | BY4741 $\alpha$ <i>Trs120-TAP::HIS3</i>                                                                                                     | Open Biosystems             |
| CFY2067         | SEY6210 <i>Trs85-TAP::HIS3</i>                                                                                                              | This study                  |
| CFY2223         | SEY6210.1 <i>ura3::GFP-Snc1::URA3</i>                                                                                                       | (Thomas and Fromme, 2016)   |
| CFY2398         | SEY6210.1 <i>Gea1-3xmRFPmars::TRP1</i>                                                                                                      | This study                  |
| CFY2449         | SEY6210.1 <i>Trs85-mNeonGreen::HIS3</i>                                                                                                     | This study                  |
| CFY2544         | SEY6210.1 <i>Trs85-mNeonGreen::HIS3 arf1<math>\Delta</math>::KanMX</i>                                                                      | This study                  |
| CFY2605         | SEY6210.1 <i>GFP-Vrg4 Trs85-3xmRFPmars::TRP1</i>                                                                                            | This study                  |
| CFY2607         | SEY6210.1 <i>Trs85-mNeonGreen::HIS3 Trs130-3xmRFPmars::TRP1</i>                                                                             | This study                  |
| CFY2628         | SEY6210.1 <i>Trs85-mNeonGreen::HIS3 Gea1-3xmRFPmars</i>                                                                                     | This study                  |
| CFY2640         | CUY4655 <i>Trs85-mRFPmars-FRB::HIS3</i>                                                                                                     | This study                  |
| CFY2692         | SEY6210 <i>trs85<math>\Delta</math>::KanMX</i>                                                                                              | This study                  |
| CFY2715         | SEY6210 <i>Trs85-mNeonGreen::HIS3 Bet3-3xmRFPmars::TRP1</i>                                                                                 | This study                  |
| CFY2717         | SEY6210 <i>Trs130-mNeonGreen::HIS3 Bet3-3xmRFPmars::TRP1</i>                                                                                | This study                  |
| CFY2732         | SEY6210 <i>Trs130-mNeonGreen::HIS3 Trs85-mNeonGreen-3xHA::KanMX<br/>Bet3-3xmRFPmars::TRP1</i>                                               | This study                  |
| CFY2808         | SEY6210 <i>Trs85-mNeonGreen::HIS3 Sec7-6xDsRed::URA3</i>                                                                                    | This study                  |
| CFY2851         | SEY6210.1 <i>Trs85-3xmRFPmars::TRP1</i>                                                                                                     | This study                  |
| CFY2854         | SEY6210.1 <i>GFP-Ypt31::URA3 Trs85-3xmRFPmars::TRP1</i>                                                                                     | This study                  |
| CFY2856         | SEY6210.1 <i>GFP-Ypt32::URA3 Trs85-3xmRFPmars::TRP1</i>                                                                                     | This study                  |
| CFY2963         | SEY6210 <i>Sec7-6xDsRed::URA3 trs85<math>\Delta</math>::KanMX</i>                                                                           | This study                  |
| CFY2976         | SEY6210 <i>GFP-Ypt31::URA3 trs85<math>\Delta</math>::KanMX</i>                                                                              | This study                  |
| CFY2983         | SEY6210 <i>Gea1-3xmRFPmars::TRP1 trs85<math>\Delta</math>::KanMX</i>                                                                        | This study                  |
| CFY2987         | SEY6210 <i>Gyp1-mNeonGreen::HIS3 Sec7-6xDsRed::URA3</i>                                                                                     | This study                  |
| CFY3015         | SEY6210 <i>atg13<math>\Delta</math>::KanMX</i>                                                                                              | This study                  |
| CFY3017         | SEY6210 <i>atg1<math>\Delta</math>::KanMX</i>                                                                                               | This study                  |
| CFY3043         | BY4141 $\alpha$ <i>get1<math>\Delta</math>::KanMX</i>                                                                                       | Open Biosystems             |
| CFY3144         | CFY2640 <i>ura3::GFP-Snc1::URA3</i>                                                                                                         | This study                  |
| CFY3146         | CFY2640 <i>Bet3-GFP::KanMX</i>                                                                                                              | This study                  |
| CFY3149         | CFY2692 <i>ura3::GFP-Snc1::URA3</i>                                                                                                         | This study                  |
| CFY3168         | BY4141 $\alpha$ <i>tlg2<math>\Delta</math>::KanMX</i>                                                                                       | Open Biosystems             |
| CFY3169         | BY4141 $\alpha$ <i>snx4<math>\Delta</math>::KanMX</i>                                                                                       | Open Biosystems             |
| CFY3170         | BY4141 $\alpha$ <i>vps21<math>\Delta</math>::KanMX</i>                                                                                      | Open Biosystems             |
| CFY3171         | BY4141 $\alpha$ <i>vps17<math>\Delta</math>::KanMX</i>                                                                                      | Open Biosystems             |

Table S3. Liposome formulations used in this study

| Lipid                  | TGN | PC <sup>a</sup> |
|------------------------|-----|-----------------|
| DOPC                   | 24% | 94%             |
| POPC                   | 6%  |                 |
| DOPE                   | 7%  |                 |
| POPE                   | 3%  |                 |
| DOPS                   | 1%  |                 |
| POPS                   | 2%  |                 |
| DOPA                   | 1%  |                 |
| POPA                   | 2%  |                 |
| PI                     | 29% |                 |
| PI(4)P                 | 1%  |                 |
| CDP-DAG                | 2%  |                 |
| DO-DAG                 | 2%  |                 |
| PO-DAG                 | 4%  |                 |
| Ceramide (C18)         | 5%  |                 |
| Cholesterol            | 10% |                 |
| Ni <sup>2+</sup> -DOGS |     | 5%              |
| DiR dye                | 1%  | 1%              |

<sup>a</sup>Phosphatidylcholine

## References

- Auffarth, K., H. Arlt, J. Lachmann, M. Cabrera, and C. Ungermann. 2014. Tracking of the dynamic localization of the Rab-specific HOPS subunits reveal their distinct interaction with Ypt7 and vacuoles. *Cell. Logist.* 4:e29191. <https://doi.org/10.4161/cl.29191>
- Brachmann, C.B., A. Davies, G.J. Cost, E. Caputo, J. Li, P. Hieter, and J.D. Boeke. 1998. Designer deletion strains derived from *Saccharomyces cerevisiae* S288C: a useful set of strains and plasmids for PCR-mediated gene disruption and other applications. *Yeast.* 14:115–132.
- Buvelot Frei, S., P.B. Rahl, M. Nussbaum, B.J. Briggs, M. Calero, S. Janeczko, A.D. Regan, C.Z. Chen, Y. Barral, G.R. Whittaker, and R.N. Collins. 2006. Bioinformatic and comparative localization of Rab proteins reveals functional insights into the uncharacterized GTPases Ypt10p and Ypt11p. *Mol. Cell. Biol.* 26:7299–7317. <https://doi.org/10.1128/MCB.02405-05>
- Lewis, M.J., B.J. Nichols, C. Prescianotto-Baschong, H. Riezman, and H.R. Pelham. 2000. Specific retrieval of the exocytic SNARE Snc1p from early yeast endosomes. *Mol. Biol. Cell.* 11:23–38. <https://doi.org/10.1091/mbc.11.1.23>
- Losev, E., C.A. Reinke, J. Jellen, D.E. Strongin, B.J. Bevis, and B.S. Glick. 2006. Golgi maturation visualized in living yeast. *Nature.* 441:1002–1006. <https://doi.org/10.1038/nature04717>
- McDonald, C.M., and J.C. Fromme. 2014. Four GTPases differentially regulate the Sec7 Arf-GEF to direct traffic at the trans-Golgi network. *Dev. Cell.* 30:759–767. <https://doi.org/10.1016/j.devcel.2014.07.016>
- Robinson, J.S., D.J. Klionsky, L.M. Banta, and S.D. Emr. 1988. Protein sorting in *Saccharomyces cerevisiae*: isolation of mutants defective in the delivery and processing of multiple vacuolar hydrolases. *Mol. Cell. Biol.* 8:4936–4948. <https://doi.org/10.1128/MCB.8.11.4936>
- Thomas, L.L., and J.C. Fromme. 2016. GTPase cross talk regulates TRAPP II activation of Rab11 homologues during vesicle biogenesis. *J. Cell Biol.* 215:499–513. <https://doi.org/10.1083/jcb.201608123>
- Weinberger, A., F. Kamena, R. Kama, A. Spang, and J.E. Gerst. 2005. Control of Golgi morphology and function by Sed5 t-SNARE phosphorylation. *Mol. Biol. Cell.* 16:4918–4930. <https://doi.org/10.1091/mbc.E05-02-0101>
